# Supplementary material
Source: PubMed Central journal article supplement (PMC5280011)
Supplement: ASN.2016010019SupplementaryData.pdf [file ASN.2016010019SupplementaryData.pdf]

## Supplementary Material

Supplementary Table 1. The overall hazard ratios for mortality over the 58 month study period\* and the 6, 12, and 24-month mortality rates in the various vascular access groups.

| Access group (N)                                                  | Hazard ratio (over 58 mo. study) (95% CI) | P       | 6 month mortality (%) | 12 month mortality (%) | 24 month mortality (%) |
|-------------------------------------------------------------------|-------------------------------------------|---------|-----------------------|------------------------|------------------------|
| AVF (9,794)                                                       | 0.50 (0.48-0.52)                          | <0.0001 | 9                     | 17                     | 31                     |
| AVF-CVC (8,230)                                                   | 0.66 (0.64-0.68)                          | <0.0001 | 15                    | 25                     | 42                     |
| <b>AVF-CVC subgroups (AVF placement time prior to initiation)</b> |                                           |         |                       |                        |                        |
| <4 mo (6,668)                                                     | 0.67 (0.65-0.70)                          | <0.001  |                       |                        |                        |
| >2 mo (4,561)                                                     | 0.66 (0.63-0.68)                          | <0.001  |                       |                        |                        |
| >4 mo (3,126)                                                     | 0.65 (0.61-0.68)                          | <0.001  | 14                    | 24                     | 41                     |
| >6 mo (2,316)                                                     | 0.64 (0.60-0.68)                          | <0.001  |                       |                        |                        |
| >9 mo (1,569)                                                     | 0.65 (0.61-0.70)                          | <0.001  |                       |                        |                        |
| CVC (90,517)                                                      | 1.0                                       |         | 32                    | 46                     | 62                     |

\*Calculated with the CVC group as reference, the Cox proportional hazards models were adjusted for the following covariates: age at hemodialysis initiation, sex, race, comorbidity index, body mass index, cause of ESRD, and duration of pre-ESRD nephrology care.

\*\*AVF access group consists of those patients with an AVF placed first and initiating hemodialysis with the AVF; AVF-CVC access group had an AVF placed first but initiated hemodialysis with a catheter and the AVF-CVC subgroups having the AVF placed less than 4 months or greater than 2, 4, 6, or 9 months before initiating HD with a catheter ; CVC access group had a catheter placed first and initiated hemodialysis with the catheter.

Supplementary Table 2. Proportional hazard analysis\* of mortality for vascular access subgroups based on age, sex, race and comorbidities with the CVC group\*\* as reference.

|                                      | AVF access group**<br>Hazard ratio (95% CI) | P      | AVF-CVC access group**<br>Hazard ratio (95% CI) | P      |
|--------------------------------------|---------------------------------------------|--------|-------------------------------------------------|--------|
| <b>Age categories</b>                |                                             |        |                                                 |        |
| 67-79                                | 0.49 (0.47-0.51)                            | <0.001 | 0.66 (0.63-0.69)                                | <0.001 |
| 80-89                                | 0.51 (0.49-0.54)                            | <0.001 | 0.67 (0.63-0.70)                                | <0.001 |
| >90                                  | 0.57 (0.45-0.71)                            | <0.001 | 0.59 (0.47-0.75)                                | <0.001 |
| <b>Sex</b>                           |                                             |        |                                                 |        |
| Males                                | 0.49 (0.47-0.52)                            | <0.001 | 0.66 (0.63-0.69)                                | <0.001 |
| Females                              | 0.51 (0.48-0.54)                            | <0.001 | 0.66 (0.63-0.70)                                | <0.001 |
| <b>Race</b>                          |                                             |        |                                                 |        |
| Whites                               | 0.50 (0.48-0.52)                            | <0.001 | 0.67 (0.64-0.69)                                | <0.001 |
| Blacks                               | 0.49 (0.44-0.54)                            | <0.001 | 0.63 (0.58-0.68)                                | <0.001 |
| <b>Comorbidity index (0-15)</b>      |                                             |        |                                                 |        |
| ≤ 7                                  | 0.48 (0.46-0.50)                            | <0.001 | 0.66 (0.63-0.70)                                | <0.001 |
| 8 to 10                              | 0.50 (0.48-0.53)                            | <0.001 | 0.65 (0.62-0.68)                                | <0.001 |
| ≥ 11                                 | 0.64 (0.53-0.76)                            | <0.001 | 0.73 (0.62-0.85)                                | <0.001 |
| <b>Diabetes***</b>                   |                                             |        |                                                 |        |
| Yes                                  | 0.50 (0.48-0.53)                            | <0.001 | 0.67 (0.64-0.70)                                | <0.001 |
| No                                   | 0.51 (0.48-0.53)                            | <0.001 | 0.65 (0.62-0.69)                                | <0.001 |
| <b>Diabetic end-organ disease***</b> |                                             |        |                                                 |        |
| Yes                                  | 0.51 (0.49-0.54)                            | <0.001 | 0.66 (0.63-0.69)                                | <0.001 |
| No                                   | 0.50 (0.48-0.52)                            | <0.001 | 0.67 (0.64-0.70)                                | <0.001 |
| <b>Cerebrovascular disease***</b>    |                                             |        |                                                 |        |
| Yes                                  | 0.53 (0.48-0.58)                            | <0.001 | 0.71 (0.65-0.77)                                | <0.001 |
| No                                   | 0.50 (0.48-0.52)                            | <0.001 | 0.66 (0.63-0.68)                                | <0.001 |
| <b>Coronary artery disease***</b>    |                                             |        |                                                 |        |
| Yes                                  | 0.52 (0.49-0.55)                            | <0.001 | 0.67 (0.64-0.71)                                | <0.001 |
| No                                   | 0.49 (0.47-0.52)                            | <0.001 | 0.66 (0.63-0.68)                                | <0.001 |
| <b>Congestive heart failure***</b>   |                                             |        |                                                 |        |
| Yes                                  | 0.53 (0.50-0.56)                            | <0.001 | 0.67 (0.63-0.70)                                | <0.001 |
| No                                   | 0.50 (0.48-0.53)                            | <0.001 | 0.67 (0.64-0.70)                                | <0.001 |
| <b>Hypertension***</b>               |                                             |        |                                                 |        |
| Yes                                  | 0.50 (0.49-0.52)                            | <0.001 | 0.66 (0.64-0.69)                                | <0.001 |
| No                                   | 0.49 (0.44-0.53)                            | <0.001 | 0.66 (0.60-0.72)                                | <0.001 |

|                                             |                  |        |                  |        |
|---------------------------------------------|------------------|--------|------------------|--------|
| <b>Malignancy***</b>                        |                  |        |                  |        |
| Yes                                         | 0.49 (0.44-0.54) | <0.001 | 0.62 (0.56-0.68) | <0.001 |
| No                                          | 0.51 (0.49-0.53) | <0.001 | 0.67 (0.65-0.69) | <0.001 |
| <b>Peripheral vascular disease***</b>       |                  |        |                  |        |
| Yes                                         | 0.53 (0.50-0.58) | <0.001 | 0.71 (0.66-0.76) | <0.001 |
| No                                          | 0.50 (0.48-0.52) | <0.001 | 0.65 (0.62-0.67) | <0.001 |
| <b>COPD***</b>                              |                  |        |                  |        |
| Yes                                         | 0.56 (0.51-0.61) | <0.001 | 0.71 (0.65-0.77) | <0.001 |
| No                                          | 0.50 (0.48-0.52) | <0.001 | 0.66 (0.63-0.68) | <0.001 |
| <b>Duration of pre-ESRD nephrology care</b> |                  |        |                  |        |
| No care (n=35,948)                          | 0.48 (0.39-0.58) | <0.001 | 0.66 (0.60-0.73) | <0.001 |
| 0-6 months (n=11,447)                       | 0.49 (0.45-0.53) | <0.001 | 0.64 (0.58-0.69) | <0.001 |
| 6-12 months (n=23,525)                      | 0.49 (0.46-0.52) | <0.001 | 0.65 (0.62-0.69) | <0.001 |
| >12 months (n=23,111)                       | 0.51 (0.48-0.54) | <0.001 | 0.68 (0.65-0.72) | <0.001 |
| Missing data (n=14,960)                     | 0.40 (0.34-0.48) | <0.001 | 0.58 (0.52-0.65) | <0.001 |

\*The results shown were derived from 40 separate Cox proportion hazard models, each of them adjusted for the following covariates: age at ESRD onset, race, sex, body mass index, primary cause of ESRD, duration of pre-ESRD nephrology care, and comorbidity index.

\*\*AVF access group consists of those patients with an AVF placed first and initiating hemodialysis with the AVF; AVF-CVC access group had an AVF placed first but initiated hemodialysis with a catheter; CVC access group had a catheter placed first and initiated hemodialysis with the catheter.

\*\*\*In subgroup analyses by comorbidities, the corresponding comorbidity was removed from the comorbidity index calculation to avoid potential co-linearity, e.g., in subgroup analysis of diabetes, diabetes was not included in the comorbidity index calculation.
